# Supplementary material
Source: PubMed Central journal article supplement (PMC2642742)
Supplement: E08-10-0999_1.pdf [file E08-10-0999_1.pdf]

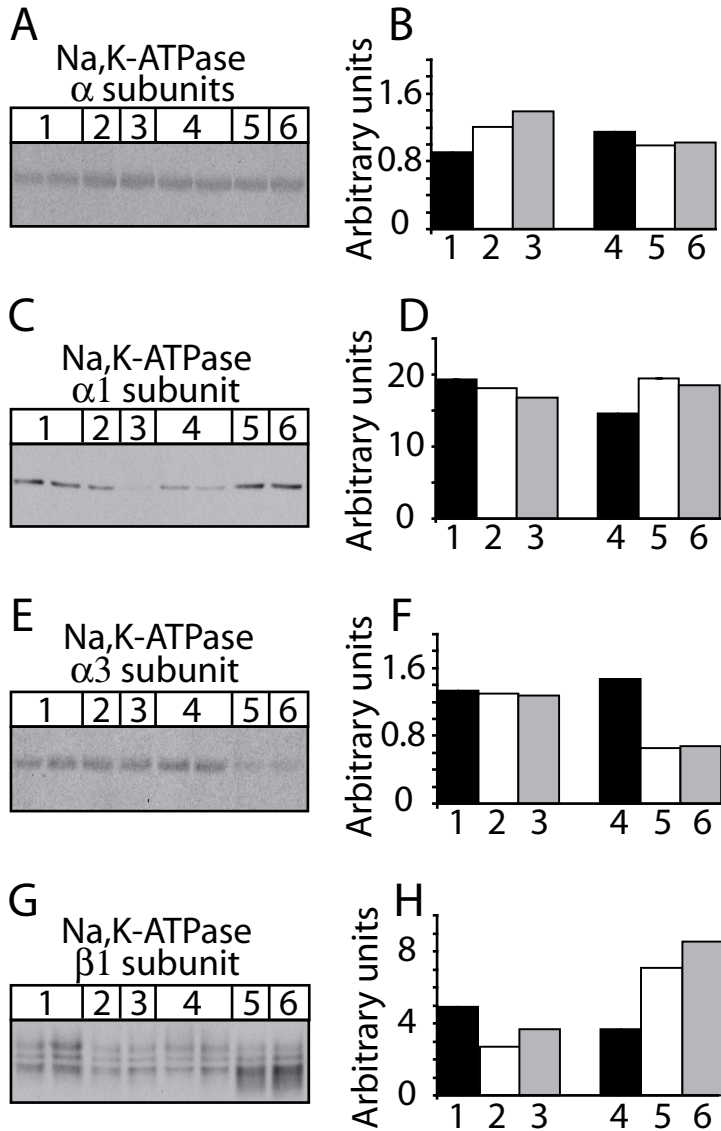

Figure S1: FXYD3 gene silencing changes the expression of Na,K-ATPase isozymes during the cell differentiation process. (A-H) Western blot analysis of Na,K-ATPase isozymes. Fifty  $\mu$ g proteins of cell lysates were subjected to SDS-PAGE, transferred onto nitrocellulose membranes, and the total Na,K-ATPase pool was immunodetected with an antibody recognizing all Na,K-ATPase  $\alpha$  isoforms (A). After stripping, the nitrocellulose membrane was probed with a Na,K-ATPase  $\alpha 1$  isoform (C) and a  $\alpha 3$  isoform-specific (E) antibody and with a  $\beta 1$  isoform-specific antibody (G). 1: siRNA2-treated Caco-2 cells at 80% confluency, 2: wild type cells at 80% confluency, 3: siRNA1-treated Caco-2 cells at 80% confluency, 4: siRNA2-treated Caco-2 cells, 21 days after confluency, 5: wild type cells, 21 days after confluency, 6: siRNA1-treated Caco-2 cells, 21 days after confluency. (B, D, F, H) Quantification of data shown in A, C, E, G.

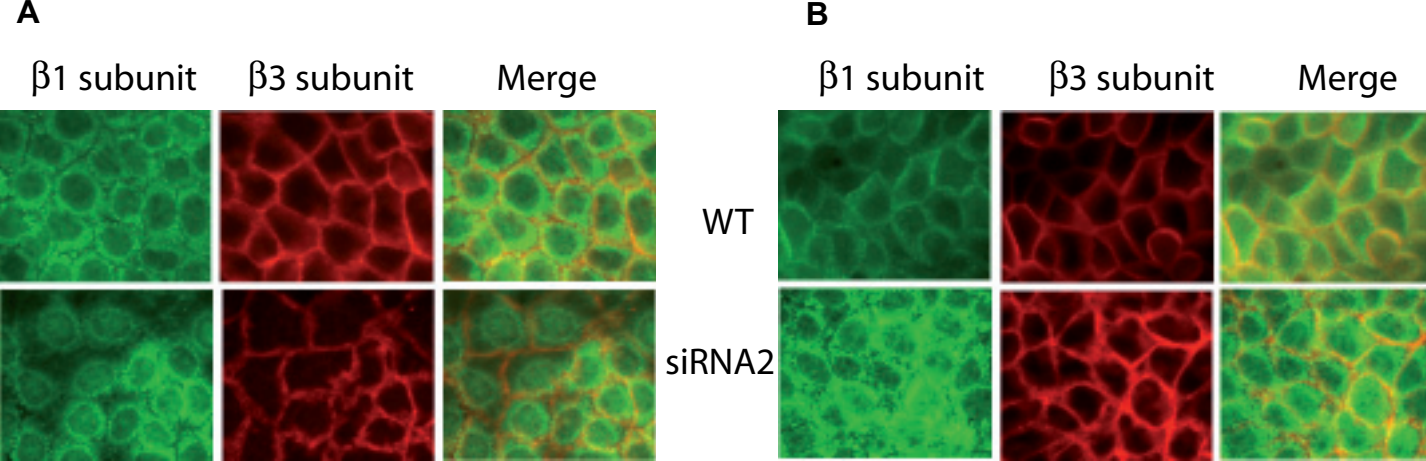

Figure S2: Double immunostaining of Caco-2 cells at 80% confluency (A) and 21 days after confluency (B) with a polyclonal  $\beta 1$  isoform-specific and a monoclonal  $\beta 3$  isoform-specific antibody. After merging, co-localization is indicated in yellow.

Table S1 : Identification of protein up-regulation in wild type and siRNA2-treated cells by a combination of 2D-DIGE and mass spectrometry.

| Dye | Vol Ratio | Intensity | Area | Up-regulation in cells treated with siRNA2 |                                              |              |                  |               |       |
|-----|-----------|-----------|------|--------------------------------------------|----------------------------------------------|--------------|------------------|---------------|-------|
|     |           |           |      | Vol                                        | Protein                                      | AC SWISSprot | Theoretical mass | Analysis done | Score |
| Cy5 | 4.8       | 8249      | 4.0  | 7117.2                                     | Carbamoyl-phosphate synthase                 | CPSM         | 165975           | M             | 101   |
| Cy5 | 4.6       | 11401     | 4.1  | 11136.8                                    | Carbamoyl-phosphate synthase                 | CPSM         | 165975           | M             | 200   |
| Cy5 | 1.5       | 1657      | 4.6  | 2748.9                                     | Lamin-A/C                                    | LMNA         | 74380            | M             | 168   |
| Cy5 | 1.5       | 2279      | 5.7  | 6747.9                                     | Heterogeneous nuclear ribonucleoprotein K    | HNRPK        | 51230            | M             | 281   |
| Cy5 | 1.5       | 3325      | 8.0  | 11439.1                                    | Retinal dehydrogenase 1                      | AL1A1        | 55454            | M             | 218   |
| Cy5 | 1.9       | 14761     | 13.0 | 59895.1                                    | Ornithine aminotransferase                   | OAT          | 48846            | M             | 237   |
| Cy5 | 1.7       | 3769      | 7.4  | 9532.8                                     | Ornithine aminotransferase                   | OAT          | 48846            | M             | 67    |
| Cy5 | 1.7       | 4694      | 4.6  | 8163.0                                     | Argininosuccinate synthase                   | ASSY         | 46786            | M             | 88    |
|     |           |           |      |                                            | Isocitrate dehydrogenase [NADP]              | IDHP         | 51333            |               | 69    |
| Cy3 | 4.5       | 3864      | 3.7  | 3415.9                                     | Carbamoyl-phosphate synthase                 | CPSM         | 165975           | M             | 180   |
| Cy3 | 7.0       | 7092      | 4.2  | 8664.6                                     | Carbamoyl-phosphate synthase                 | CPSM         | 165975           | M             | 143   |
| Cy3 | 7.4       | 11101     | 4.8  | 14473.0                                    | Carbamoyl-phosphate synthase                 | CPSM         | 165975           | M             | 100   |
| Cy3 | 1.5       | 3284      | 6.7  | 7793.2                                     | Proliferation-associated protein 2G4         | PA2G4        | 41228            | M             | 82    |
| Cy3 | 2.5       | 14626     | 12.4 | 50871.0                                    | Ornithine aminotransferase                   | OAT          | 48846            | M             | 221   |
| Cy3 | 1.7       | 2656      | 7.0  | 8346.3                                     | Ornithine aminotransferase                   | OAT          | 48846            | M             | 87    |
| Cy3 | 1.9       | 3261      | 5.2  | 6985.4                                     | Isocitrate dehydrogenase [NADP]              | IDHP         | 51333            | M             | 70    |
| Cy3 | 1.5       | 3838      | 9.9  | 12515.7                                    | Isocitrate dehydrogenase [NADP]              | IDHP         | 51333            | M             | 118   |
| Cy3 | 1.7       | 2281      | 7.2  | 5442.2                                     | Medium-chain specific acyl-CoA dehydrogenase | ACADM        | 47015            | M             | 124   |
| Cy3 | 1.7       | 2454      | 6.3  | 6555.1                                     | Methionine aminopeptidase 1                  | AMPM1        | 44100            |               | 126   |
|     |           |           |      |                                            | L-2-hydroxyglutarate dehydrogenase           | L2HDH        | 51068            | M             | 98    |
| Cy3 | 1.6       | 421       | 8.5  | 2233.7                                     | PDZ domain-containing protein GIPC1          | GIPC1        | 36141            | LC            | 148   |
|     |           |           |      |                                            | Mitochondrial 28S ribosomal protein S22      | RT22         | 41425            |               | 117   |
|     |           |           |      |                                            | NAD-dependent deacetylase siruin-2           | SIRT2        | 43782            |               | 111   |
|     |           |           |      |                                            | Heterogeneous nuclear ribonucleoprotein H3   | HNRH3        | 36960            |               | 72    |

| Dye | Vol Ratio | Intensity | Area | Up-regulation in Wild type cells |                                                           |              |                  |               |       |
|-----|-----------|-----------|------|----------------------------------|-----------------------------------------------------------|--------------|------------------|---------------|-------|
|     |           |           |      | Vol                              | Protein                                                   | AC SWISSprot | Theoretical mass | Analysis done | Score |
| Cy3 | 1.6       | 5144      | 21.7 | 27601.5                          | Cleavage and polyadenylation specificity factor subunit 5 | CPSF5        | 26268            | M             | 112   |
| Cy3 | 1.8       | 2282      | 13.8 | 10238.0                          | Glutathione S-transferase A2                              | GSTA2        | 25648            | M             | 112   |
| Cy3 | 1.6       | 623       | 18.1 | 5748.8                           | Galectin-3                                                | LEG3         | 26229            | M             | 84    |
| Cy3 | 2.0       | 3022      | 32.7 | 26825.5                          | Calmodulin                                                | CALM         | 16827            | M             | 69    |
| Cy3 | 1.7       | 1741      | 7.2  | 4087.8                           | Protein-glutamine gamma-glutamyltransferase 2             | TGM2         | 78420            | M             | 200   |
| Cy3 | 1.9       | 828       | 5.0  | 1182.2                           | Phosphofructokinase, platelet                             | Q5VSR8       | 86454            | LC            | 703   |
|     |           |           |      |                                  | Nucleolin                                                 | NUCL         | 76625            |               | 123   |
|     |           |           |      |                                  | Heterogeneous nuclear ribonucleoprotein Q                 | HNRPQ        | 69788            |               | 48    |
| Cy3 | 1.5       | 1075      | 5.1  | 1897.6                           | Meprin A subunit alpha precursor                          | MEP1A        | 85398            | M             | 75    |
| Cy3 | 1.6       | 2443      | 3.5  | 2679.3                           | Lamin-A/C                                                 | LMNA         | 74380            | M             | 88    |
| Cy3 | 1.6       | 8426      | 11.5 | 19421.7                          | Very long-chain specific acyl-CoA dehydrogenase           | ACADV        | 70745            | M             | 516   |
|     |           |           |      |                                  | Carnitine O-acetyltransferase                             | CACP         | 71336            |               | 184   |
| Cy3 | 1.6       | 2358      | 8.2  | 5100.2                           | ERO1-like protein alpha precursor                         | ERO1A        | 55213            | M             | 573   |
| Cy3 | 1.5       | 3220      | 5.2  | 4087.4                           | Very long-chain specific acyl-CoA dehydrogenase           | ACADV        | 70745            | M             | 333   |
| Cy3 | 2.0       | 6852      | 13.4 | 18286.4                          | Prolyl 4-hydroxylase subunit alpha-1 precursor            | P4HA1        | 61296            | M             | 70    |
| Cy3 | 1.6       | 1353      | 3.7  | 1725.1                           | Dihydroxyacetone kinase                                   | DAK          | 59282            | LC            | 319   |
|     |           |           |      |                                  | KDEL motif-containing protein 2 precursor                 | KDEL2        | 58934            |               | 66    |
|     |           |           |      |                                  | T-complex protein 1 subunit eta                           | TCPH         | 59842            |               | 54    |
| Cy3 | 1.6       | 20094     | 10.5 | 60416.5                          | Keratin, type II cytoskeletal 8                           | K2C8         | 53671            | M             | 269   |
| Cy3 | 1.7       | 3619      | 8.1  | 11461.8                          | Keratin, type II cytoskeletal 8                           | K2C8         | 53671            | M             | 110   |
| Cy3 | 1.5       | 1217      | 7.3  | 2537.6                           | NADPH:adrenodoxin oxidoreductase                          | ADRO         | 54259            | M             | 94    |
| Cy3 | 1.6       | 4172      | 6.1  | 9713.0                           | Pyruvate dehydrogenase E1 component subunit alpha         | ODPA         | 43952            | M             | 172   |

|     |     |       |      |         |                                                           |        |        |    |     |
|-----|-----|-------|------|---------|-----------------------------------------------------------|--------|--------|----|-----|
| Cy5 | 1.5 | 2015  | 20.0 | 11945.7 | Annexin A5                                                | ANXA5  | 35971  | M  | 122 |
| Cy5 | 1.8 | 1723  | 12.3 | 7023.6  | Pyroline-5-carboxylate reductase                          | A6NFM2 | 33548  | M  | 69  |
| Cy5 | 1.5 | 1991  | 6.8  | 6254.1  | Adenylate kinase isoenzyme 4                              | KAD4   | 25366  | M  | 96  |
| Cy5 | 1.9 | 4955  | 14.7 | 22482.8 | Cleavage and polyadenylation specificity factor subunit 5 | CPSF5  | 26268  | M  | 136 |
| Cy5 | 1.7 | 1458  | 15.1 | 7886.4  | Glutathione S-transferase A2                              | GSTA2  | 25648  | M  | 39  |
| Cy5 | 1.8 | 1802  | 3.4  | 1947.5  | Pyruvate carboxylase, mitochondrial precursor             | PYC    | 130293 | M  | 92  |
| Cy5 | 1.6 | 854   | 6.1  | 2398.9  | Meprin A subunit alpha precursor                          | MEP1A  | 85398  | M  | 156 |
| Cy5 | 1.6 | 404   | 5.5  | 1715.1  | Protein disulfide-isomerase A4 precursor                  | PDIA4  | 73229  | LC | 146 |
|     |     |       |      |         | NADH-ubiquinone oxidoreductase 75 kDa subunit,            | NDUS1  | 80443  |    | 110 |
|     |     |       |      |         | Leucine-rich PPR motif-containing protein                 | LPPRC  | 159003 |    | 95  |
|     |     |       |      |         | Nucleolin                                                 | NUCL   | 76625  |    | 92  |
| Cy5 | 1.6 | 1683  | 6.8  | 3066.4  | Very long-chain specific acyl-CoA dehydrogenase           | ACADV  | 70745  | M  | 130 |
| Cy5 | 1.8 | 3993  | 14.8 | 13301.9 | Prolyl 4-hydroxylase subunit alpha-1 precursor            | P4HA1  | 61296  | M  | 199 |
| Cy5 | 1.6 | 2398  | 5.9  | 4651.3  | Protein disulfide-isomerase A3 precursor                  | PDIA3  | 57146  | M  | 96  |
| Cy5 | 1.6 | 21571 | 11.2 | 70050.6 | Keratin, type II cytoskeletal 8                           | K2C8   | 53671  | M  | 290 |
| Cy5 | 1.6 | 4512  | 6.9  | 15493.7 | Keratin, type II cytoskeletal 8                           | K2C8   | 53671  | M  | 89  |
| Cy5 | 1.8 | 1973  | 11.7 | 8610.5  | Protein NDRG1                                             | NDRG1  | 43264  | M  | 65  |
| Cy5 | 2.5 | 6845  | 14.5 | 23841.5 | Creatine kinase B-type                                    | KCRB   | 42902  | M  | 234 |

Proteins from each cell lysate were labelled separately with CyDye DIGE fluor Cy3 or Cy5 dye. Only spots showing a volume ratio greater than 1.5 were considered as significant. Theoretical mass was calculated from the sequence. Score : MASCOT score, M: MALDI-MS/MS, LC: LC-MS/MS.
